# Supplementary figures and images for: Sialic acid-conjugate modified liposomes targeting neutrophils for improved tumour therapy
Source: Royal Society of Chemistry journal article supplement (doi:10.1039/c9bm01732a), 2020-01-01

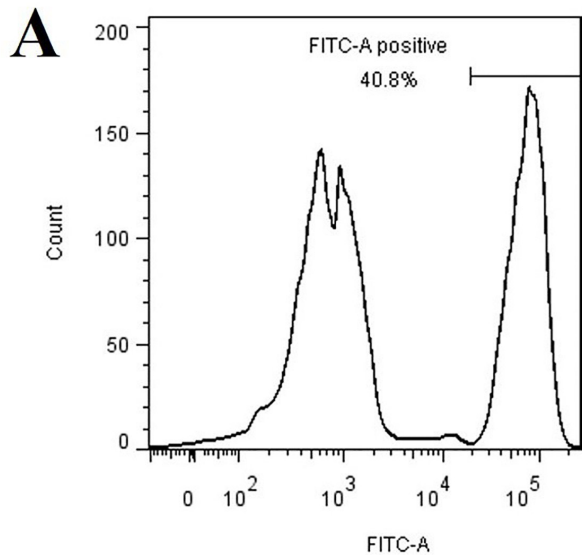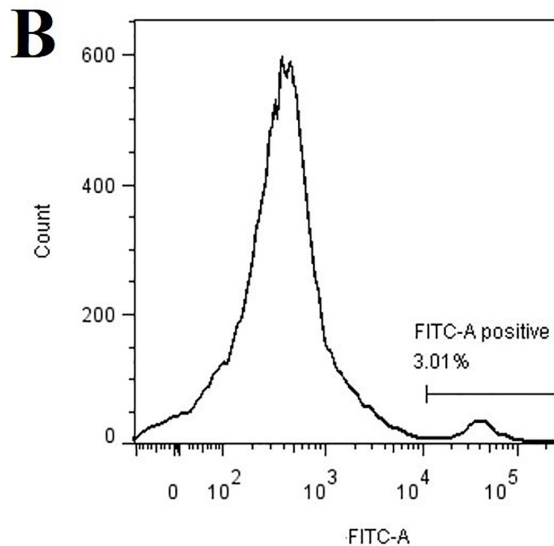

Supplement: c9bm01732a10.pdf [file c9bm01732a10.pdf]

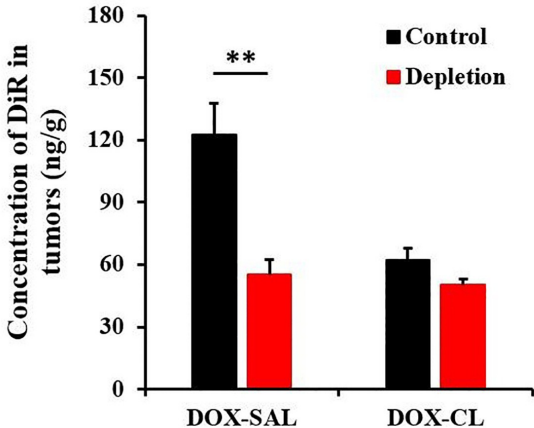

Supplement: c9bm01732a11.pdf [file c9bm01732a11.pdf]

**A**

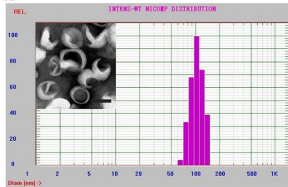

**B**

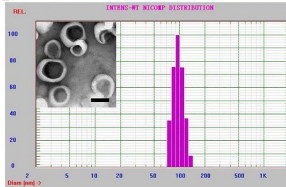

Supplement: c9bm01732a2.pdf [file c9bm01732a2.pdf]

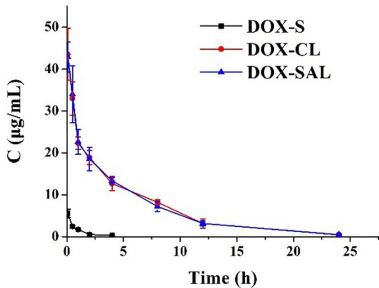

Supplement: c9bm01732a3.pdf [file c9bm01732a3.pdf]

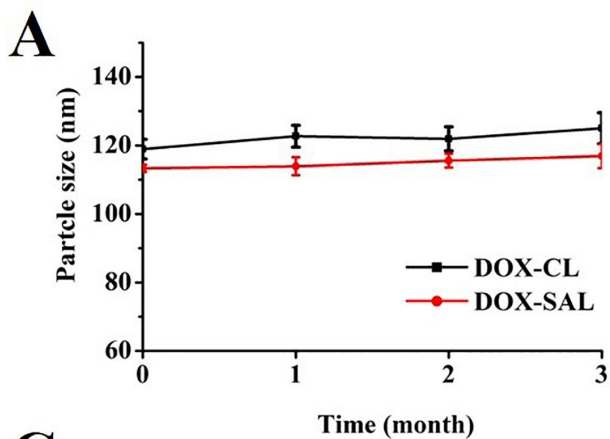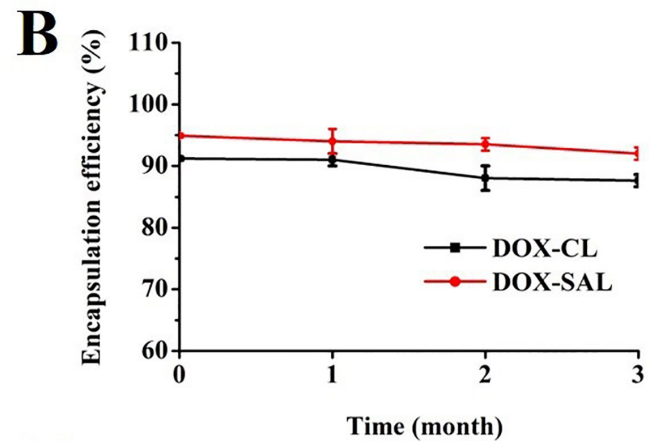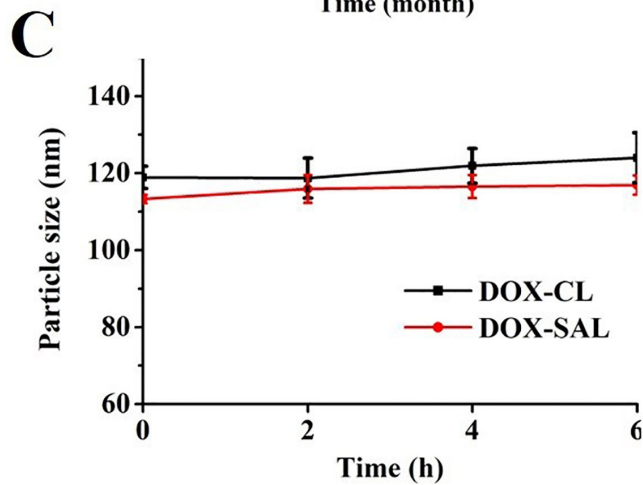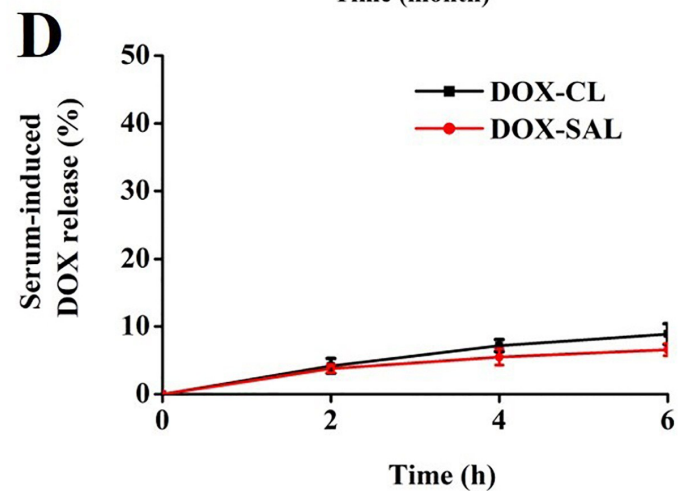

Supplement: c9bm01732a4.pdf [file c9bm01732a4.pdf]

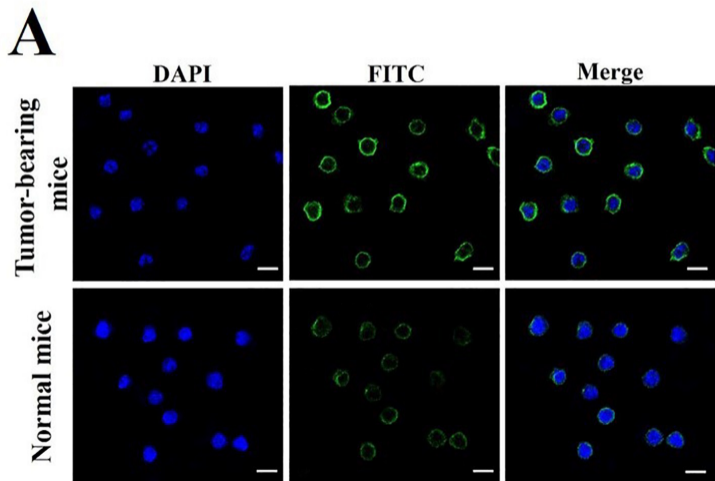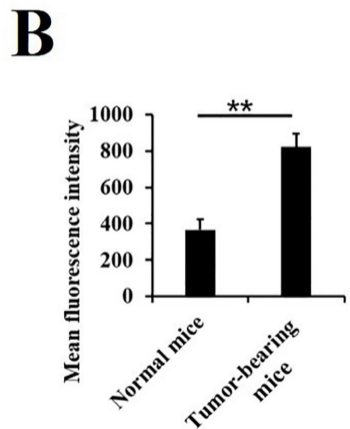

Supplement: c9bm01732a5.pdf [file c9bm01732a5.pdf]

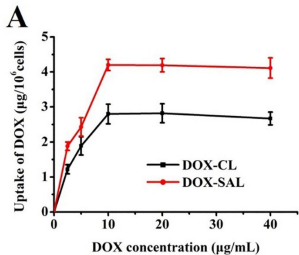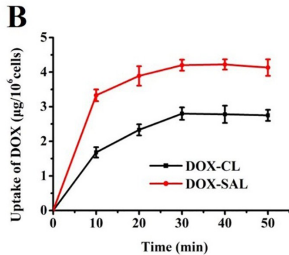

Supplement: c9bm01732a6.pdf [file c9bm01732a6.pdf]

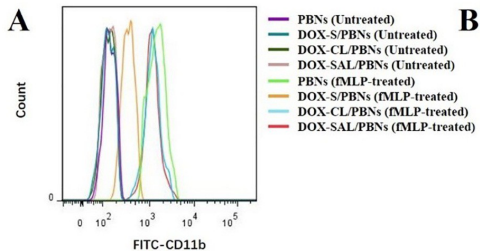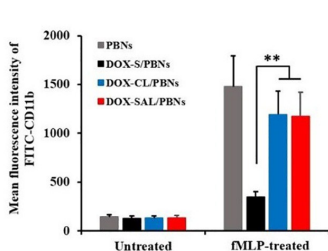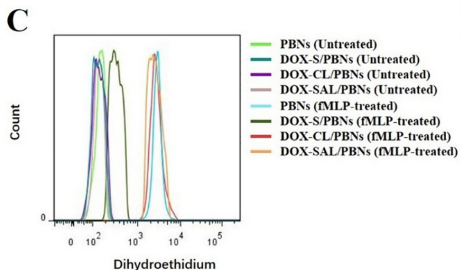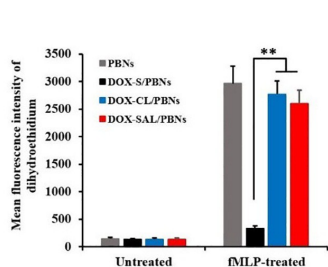

Supplement: c9bm01732a7.pdf [file c9bm01732a7.pdf]

0 h

4 h

8 h

DiR-CL/PBNs

Hoechst  
33342

DiR

FITC

PI

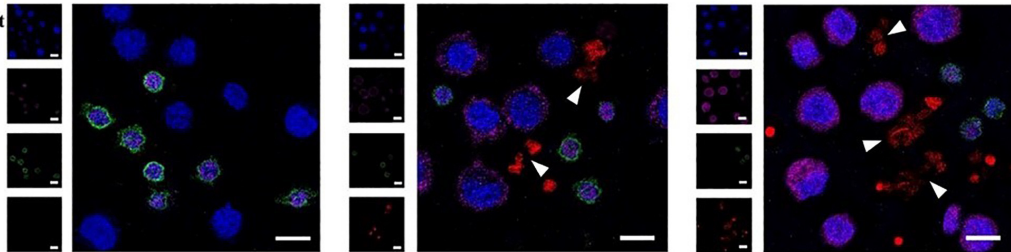

DiR-SAL/PBNs

Hoechst  
33342

DiR

FITC

PI

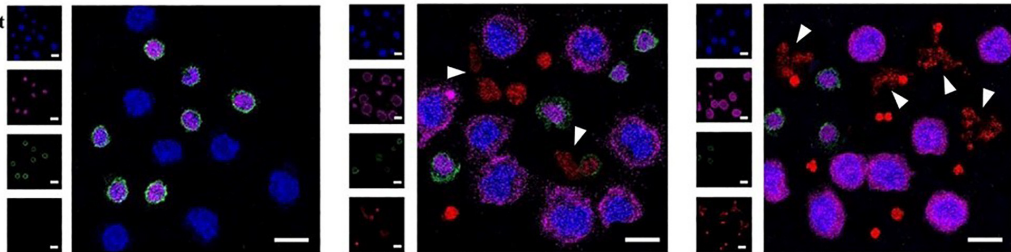

Supplement: c9bm01732a8.pdf [file c9bm01732a8.pdf]

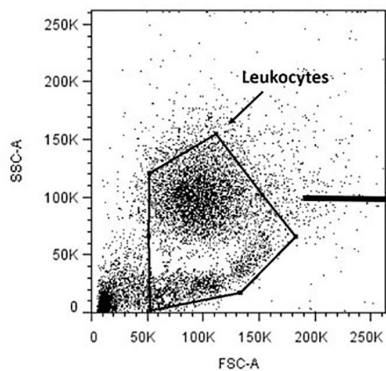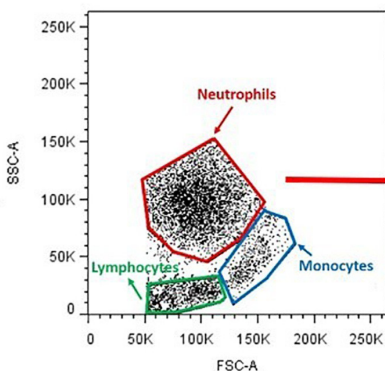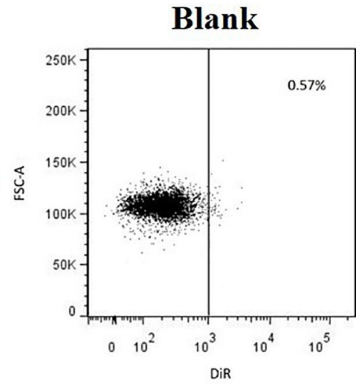

DiR-SAL

5 min

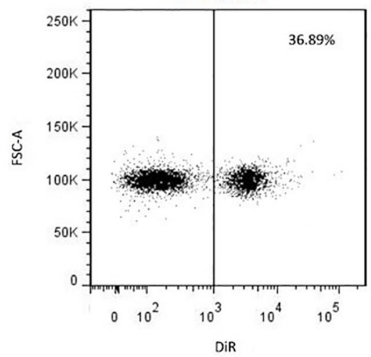

15 min

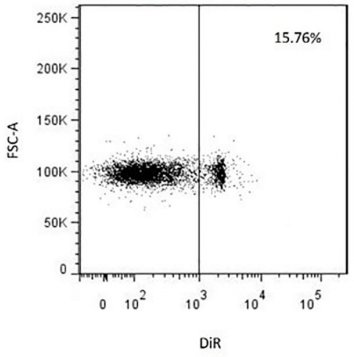

30 min

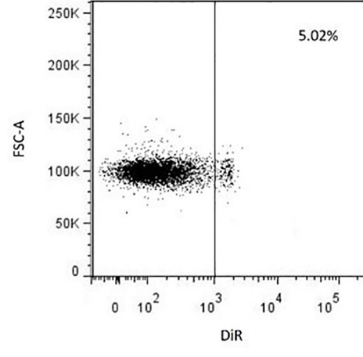

DiR-CL

5 min

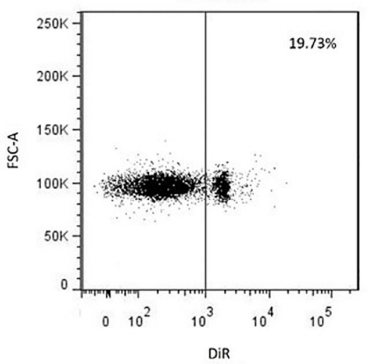

15 min

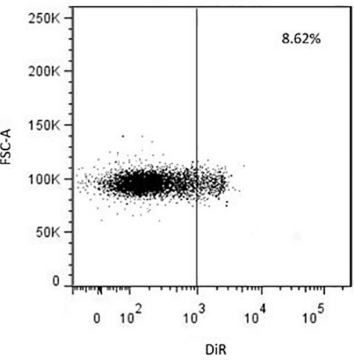

30 min

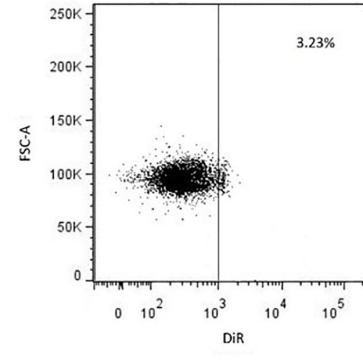

Supplement: c9bm01732a9.pdf [file c9bm01732a9.pdf]
